# Supplementary material for: A cis-regulatory element promoting increased transcription at low temperature in cultured ectothermic Drosophila cells
Source: PubMed Central journal article supplement (PMC8555087; doi:10.1186/s12864-021-08057-4), 2021-10-28

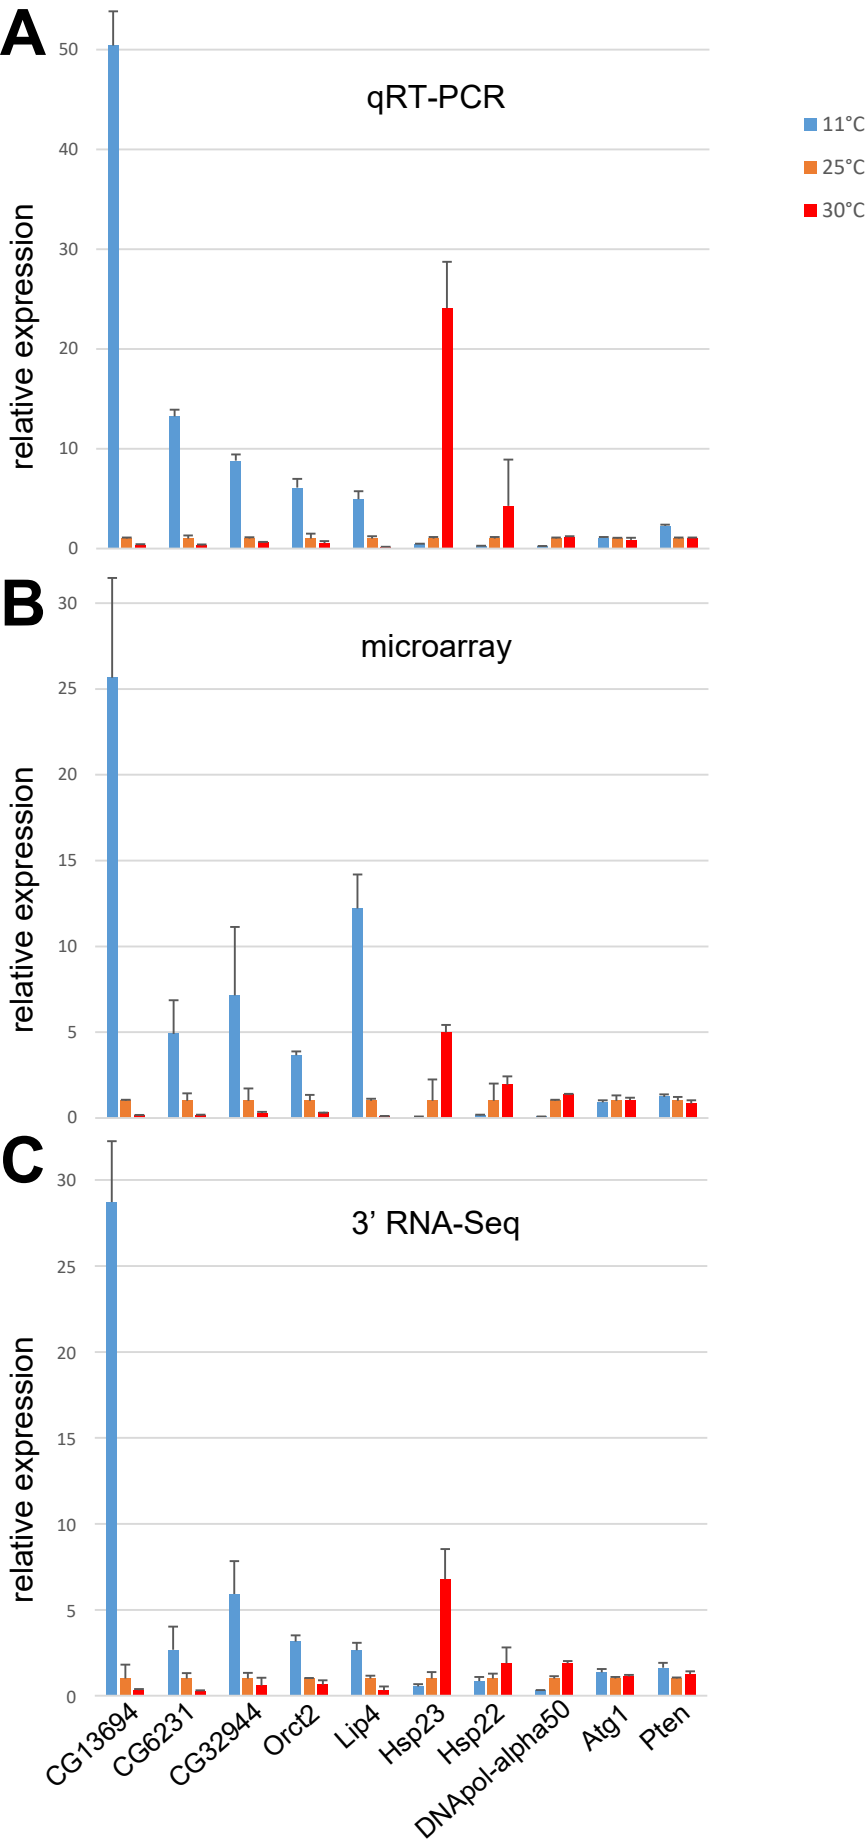

Supplement: 12864_2021_8057_MOESM3_ESM.pdf [file 12864_2021_8057_MOESM3_ESM.pdf]
