# Supplementary material for: A cis-regulatory element promoting increased transcription at low temperature in cultured ectothermic Drosophila cells
Source: PubMed Central journal article supplement (PMC8555087; doi:10.1186/s12864-021-08057-4), 2021-10-28
Supplement: 12864_2021_8057_MOESM17_ESM.pdf [file 12864_2021_8057_MOESM17_ESM.pdf]

**A**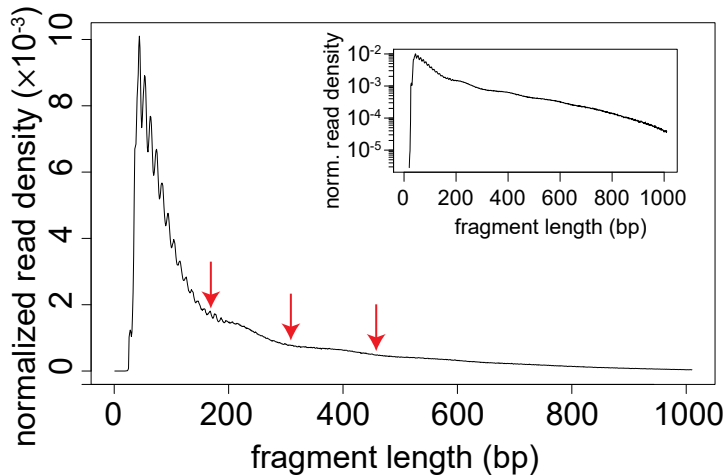**B**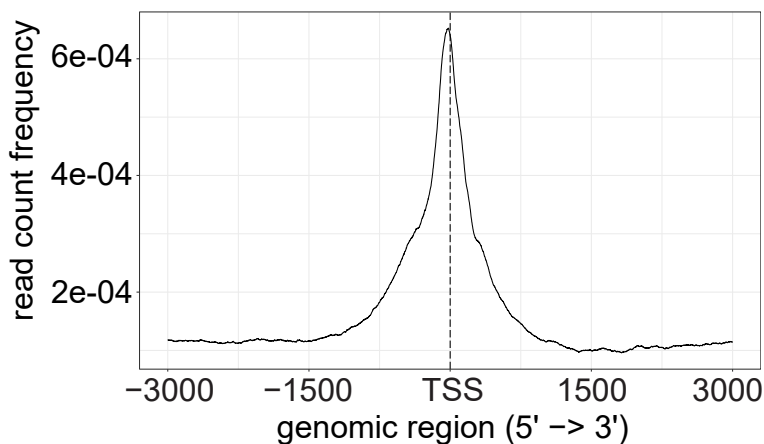**C**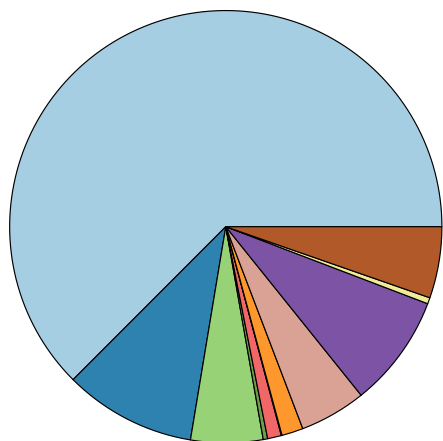

- promoter ( $\leq 1$  kb) (62.51%)
- promoter (1–2 kb) (9.87%)
- promoter (2–3 kb) (5.39%)
- 5' UTR (0.33%)
- 3' UTR (1.03%)
- 1<sup>st</sup> Exon (0.05%)
- other Exon (1.61%)
- 1<sup>st</sup> Intron (4.97%)
- other Intron (8.43%)
- downstream ( $\leq 300$ ) (0.46%)
- distal intergenic (5.33%)
