# Supplementary material for: A cis-regulatory element promoting increased transcription at low temperature in cultured ectothermic Drosophila cells
Source: PubMed Central journal article supplement (PMC8555087; doi:10.1186/s12864-021-08057-4), 2021-10-28
Supplement: 12864_2021_8057_MOESM19_ESM.pdf [file 12864_2021_8057_MOESM19_ESM.pdf]

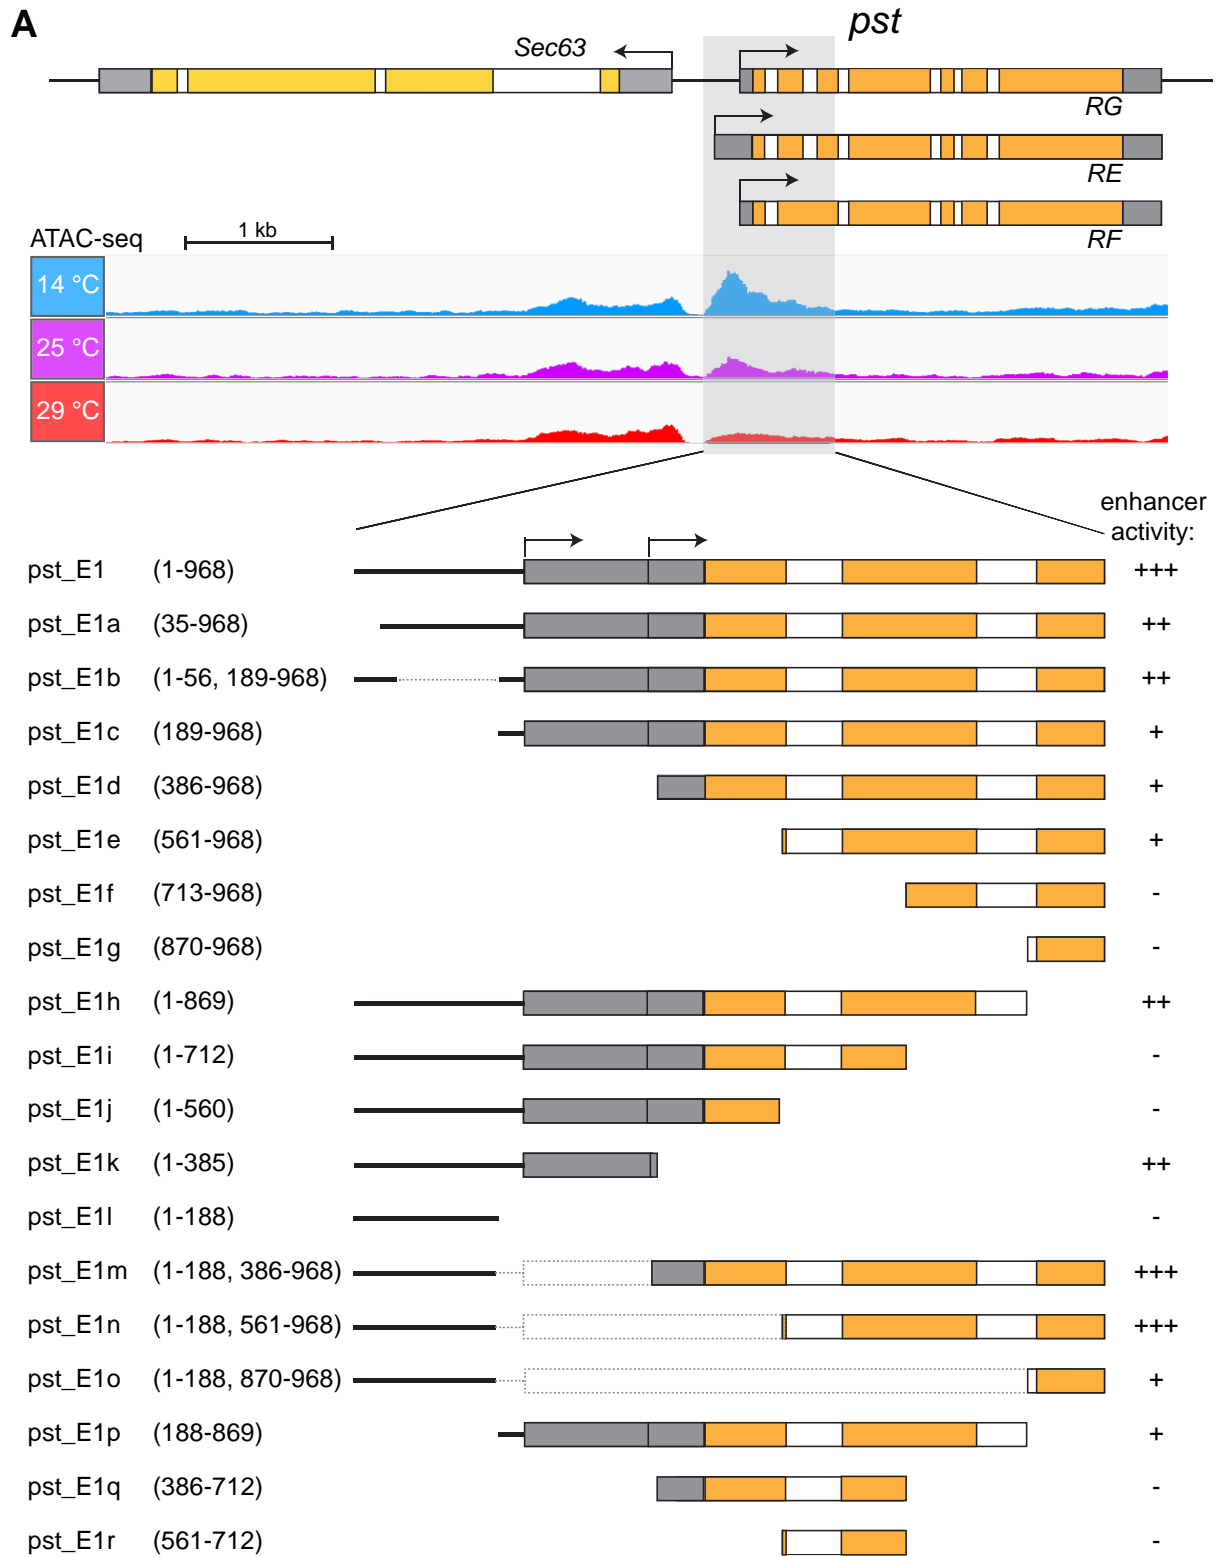

Bai et al., S10 Fig.

**B**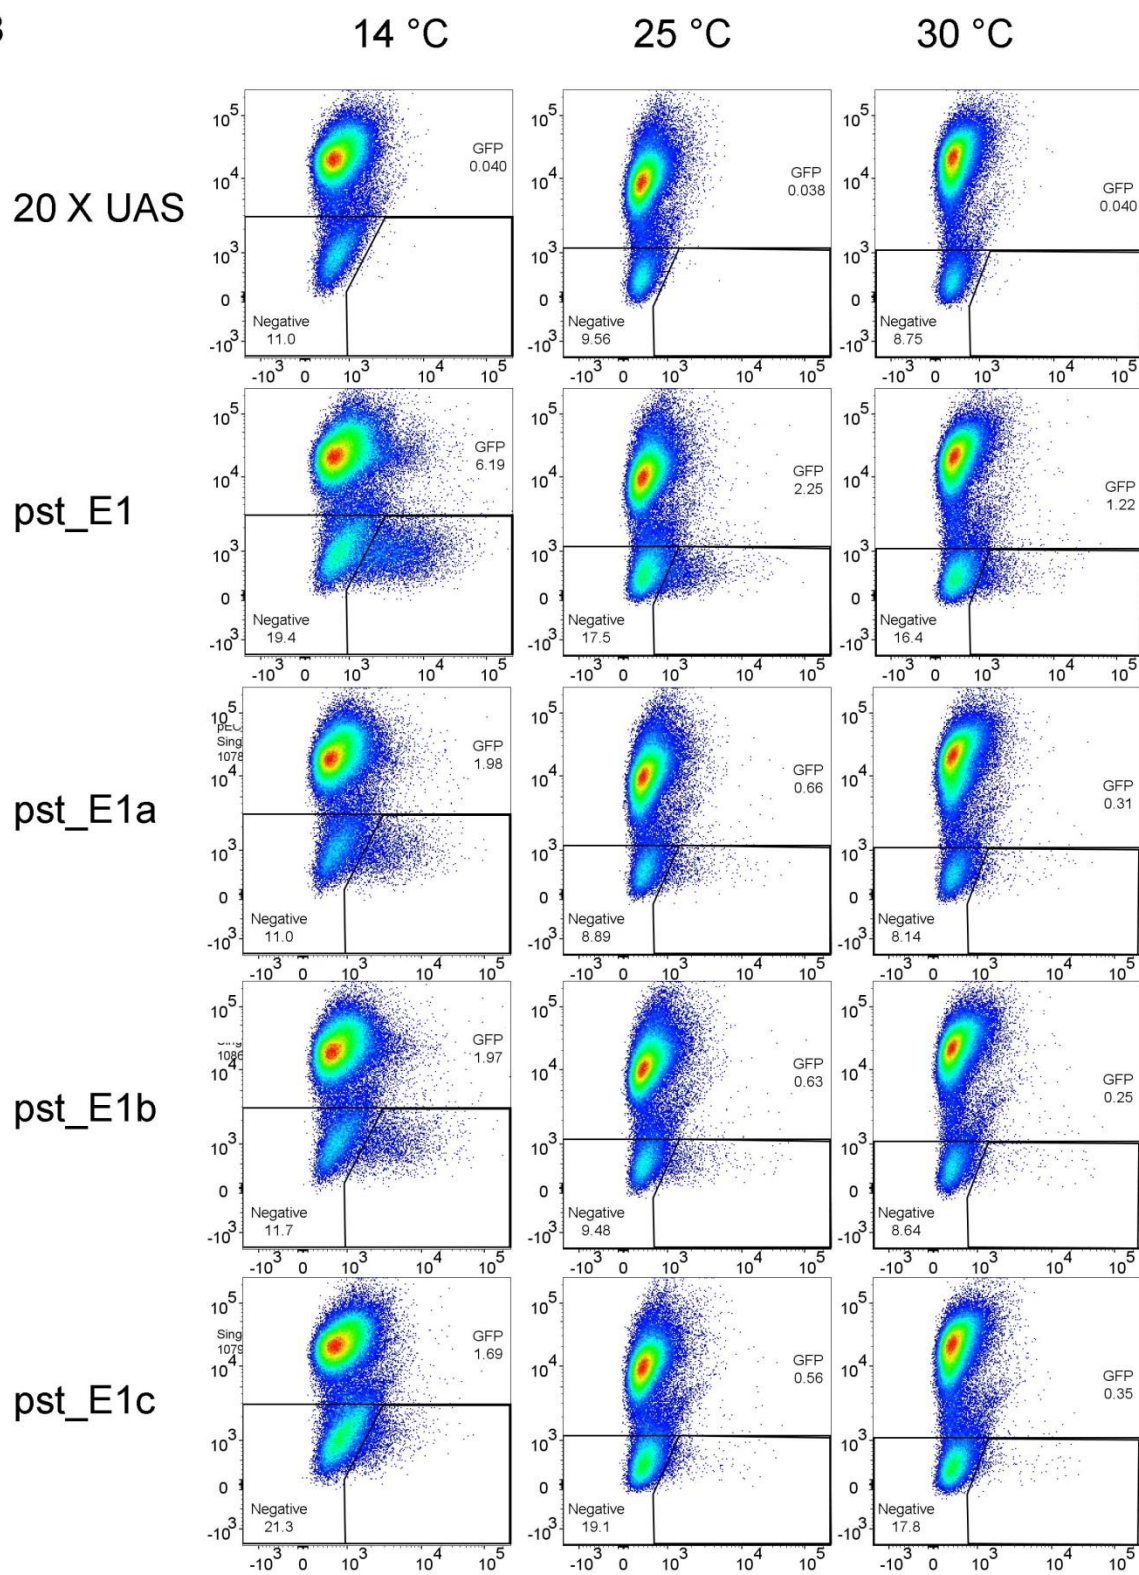

Bai et al., S10 Fig.

**B**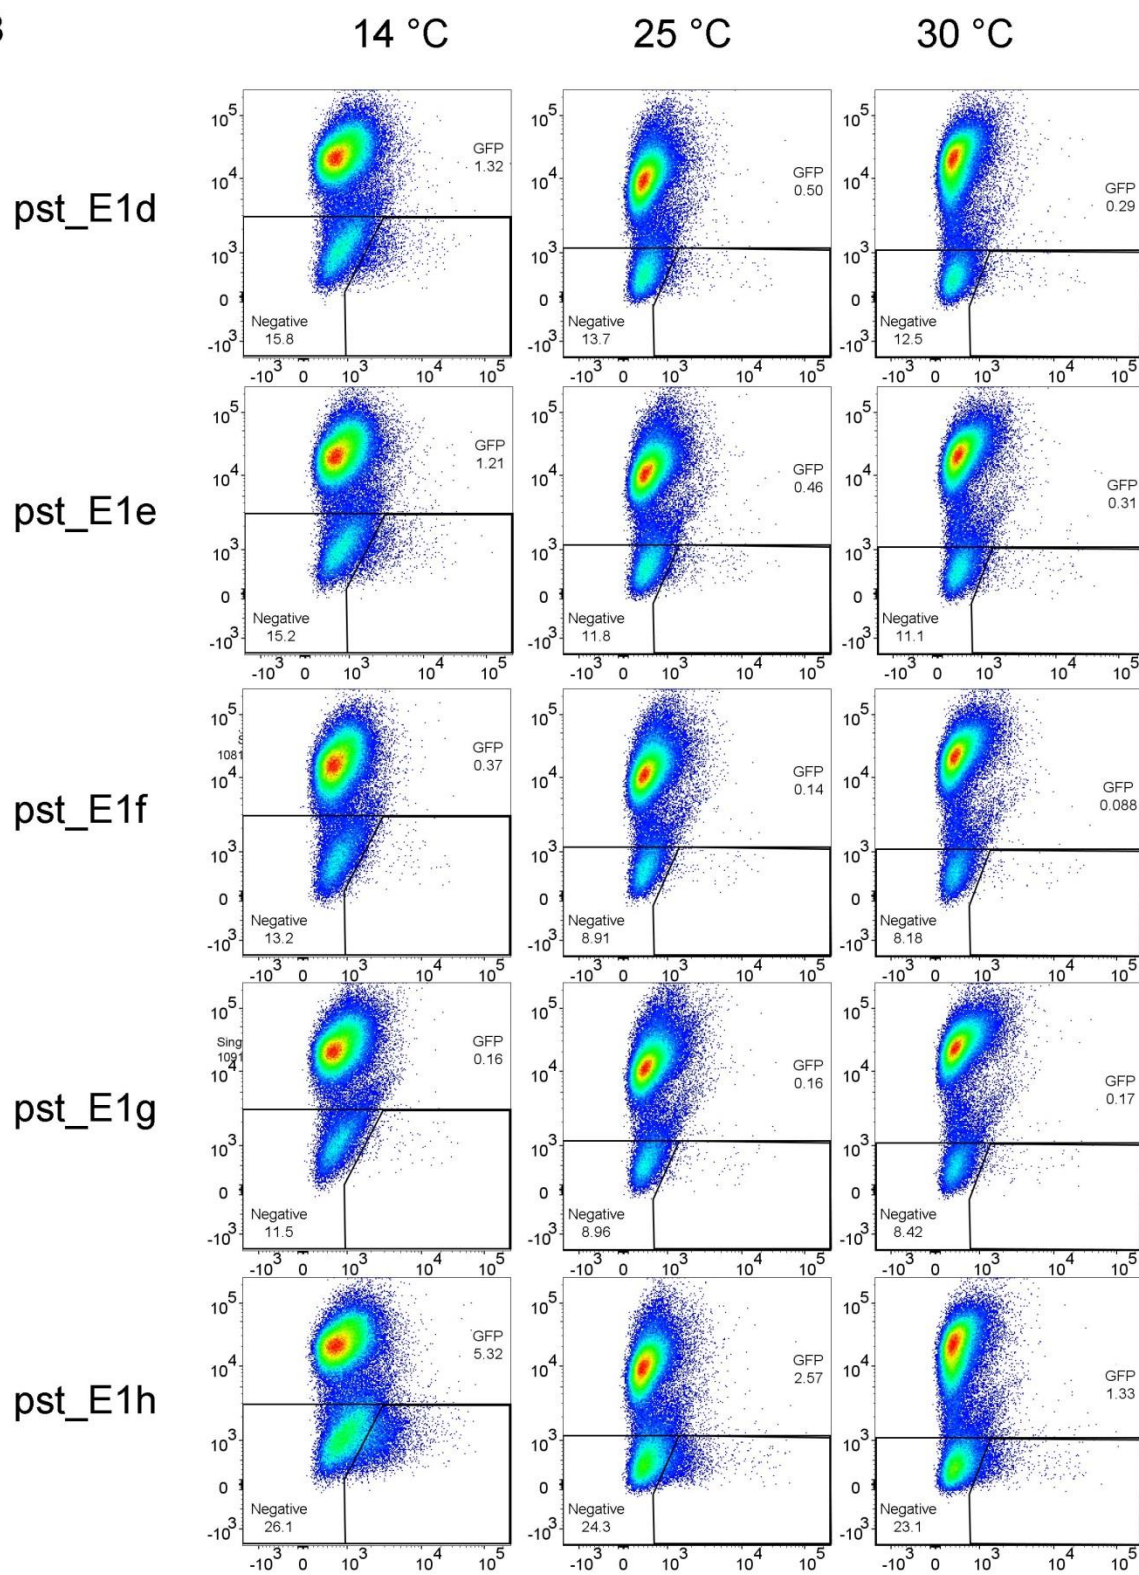



Bai et al., S10 Fig.

**B**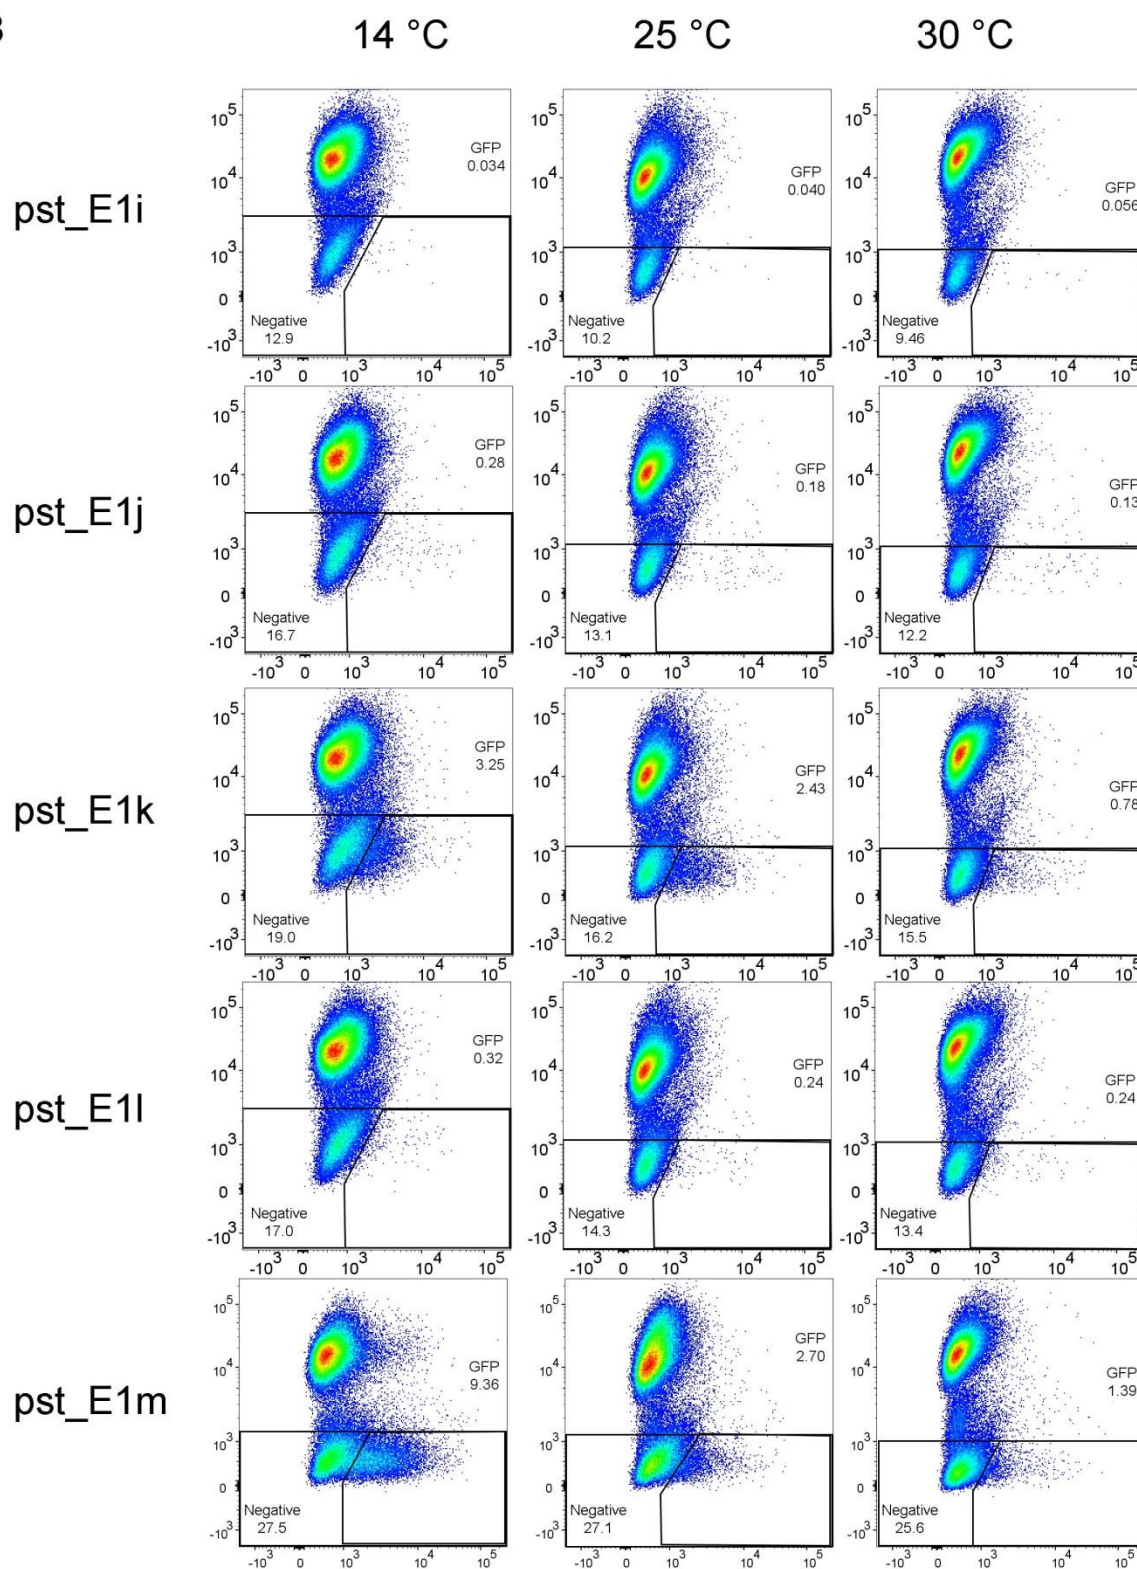

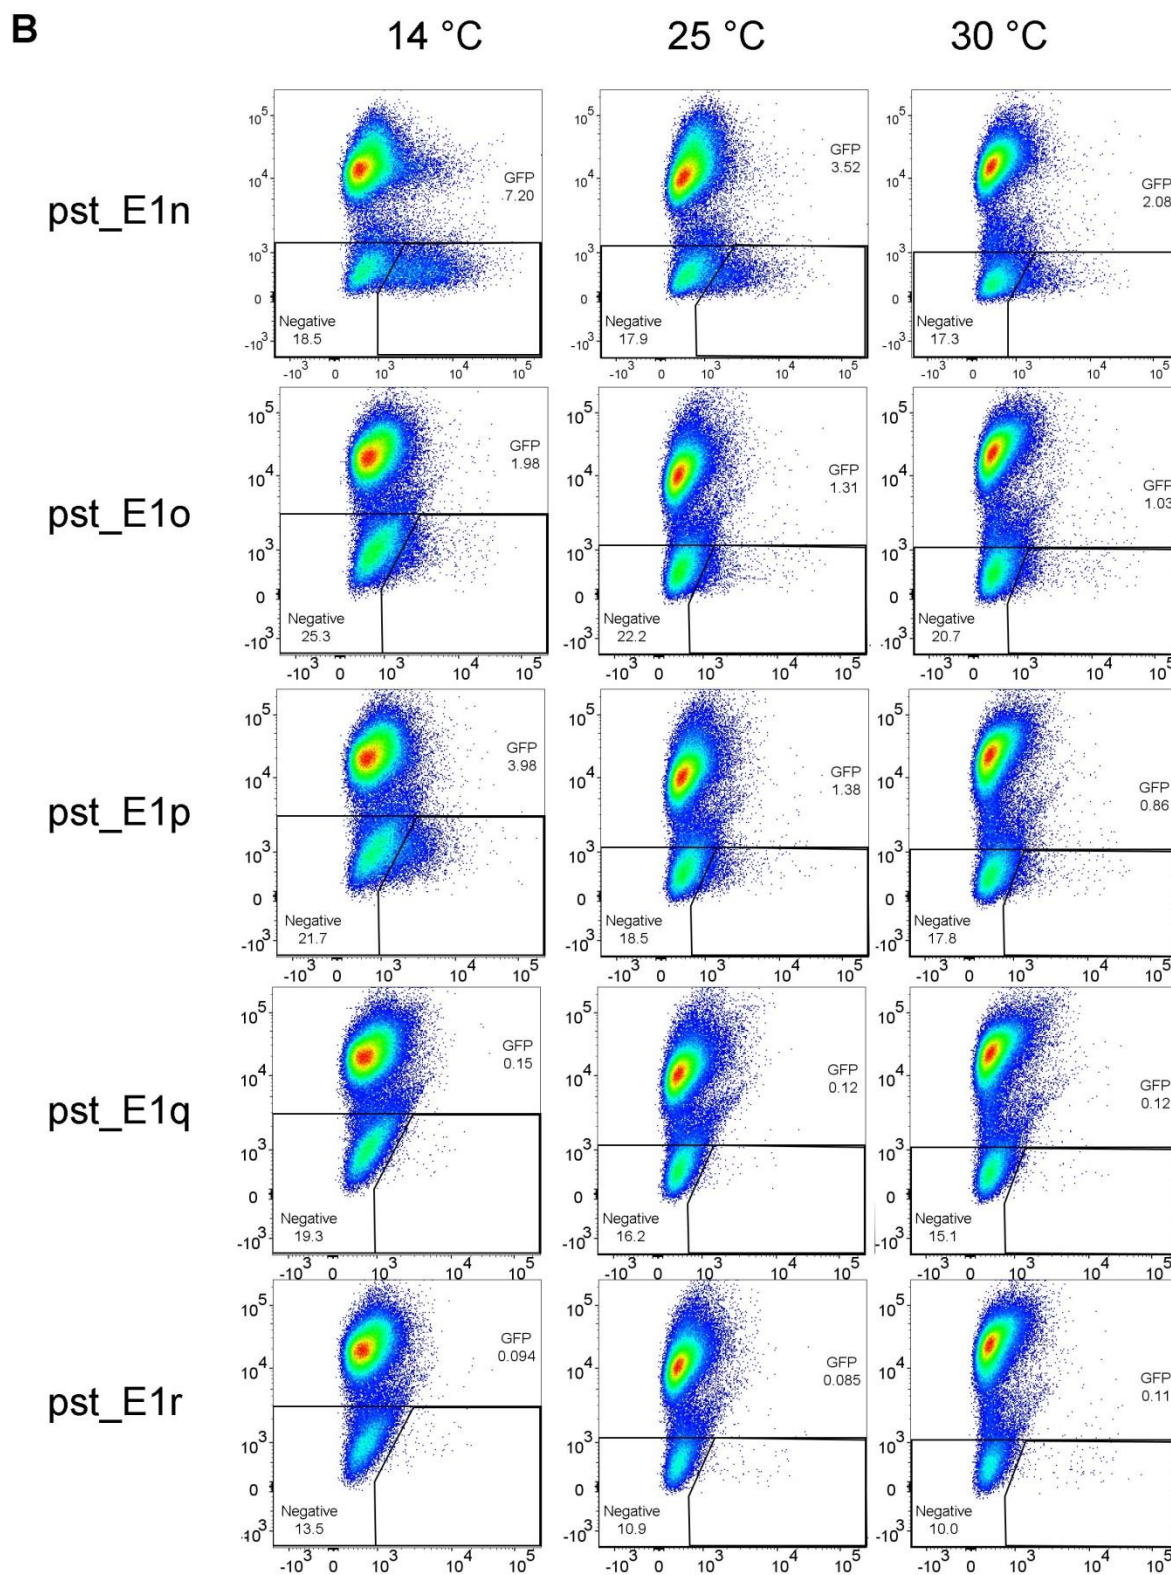

**S10 Fig. Dissection of *pst\_E1* region**

(A) Schematic illustration of analyzed truncation series, with transcription start sites (kinked arrows), untranslated regions (grey boxes), coding region (yellow boxes) and introns (white boxes) indicated.

(B) Scatter plots of the results obtained by flow cytometry after RMCE with SR9rg cells and incubation at the indicated temperatures.
